# Supplementary material for: N2reduction in uranium-doped C2N/C3N4monolayers: a DFT computational study
Source: Royal Society of Chemistry journal article supplement (doi:10.1039/d3nj01668d), 2023-01-01
Supplement: d3nj01668d1.pdf [file d3nj01668d1.pdf]

## Supporting Information

# **N<sub>2</sub> reduction on uranium-doped C<sub>2</sub>N/C<sub>3</sub>N<sub>4</sub> monolayers: A DFT computational study**

Huijie Liu, Mengnan Qu, Aijun Du and Qiao Sun\*

a State Key Laboratory of Radiation Medicine and Protection, School for Radiological and Interdisciplinary Sciences, Institution Soochow University, Suzhou 215123, China, E-mail: [sunqiao@suda.edu.cn](mailto:sunqiao@suda.edu.cn)

b School of Chemistry, Queensland University of Technology Institution, Brisbane, QLD 4001, Australia

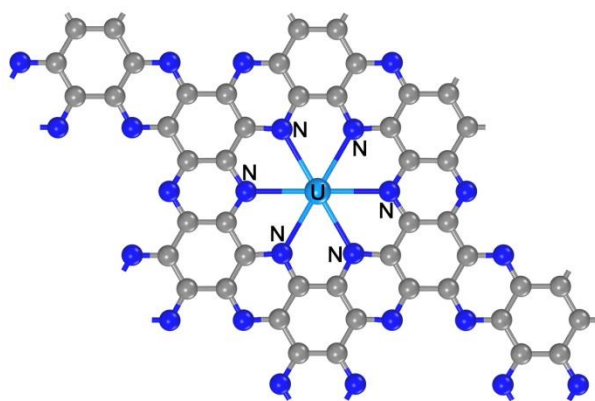

U-N average bond length: 2.680 Å

(a)

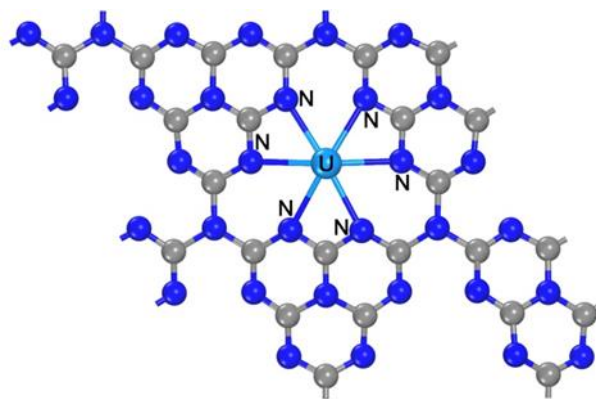

U-N average bond length: 2.432 Å

(b)

**Fig. S1** Top and side views of optimized structures of (a)  $\text{U-C}_2\text{N}$  and (b)  $\text{U-C}_3\text{N}_4$  with full N-U bonds and U-N average bond lengths. The colors of the spheres have the same meaning of atoms in **Fig. 1**.

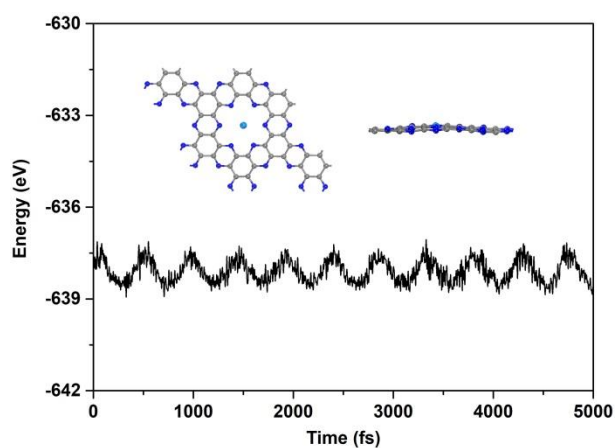

(a)

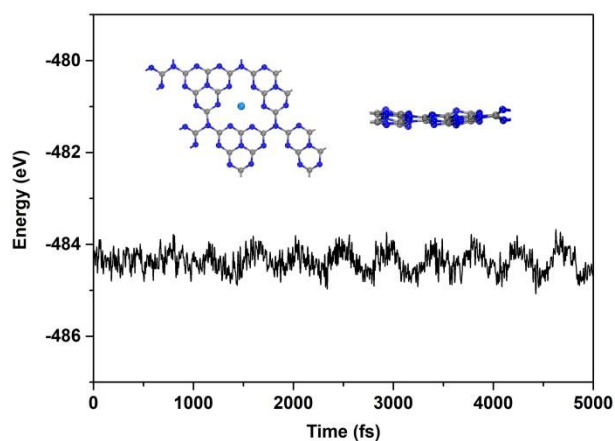

(b)

**Fig. S2** Variations of energy against time for AIMD simulations of (a)  $\text{U-C}_2\text{N}$  and (b)  $\text{U-C}_3\text{N}_4$ . The simulation is run at 300 K for 5 ps with a time step of 1 fs.

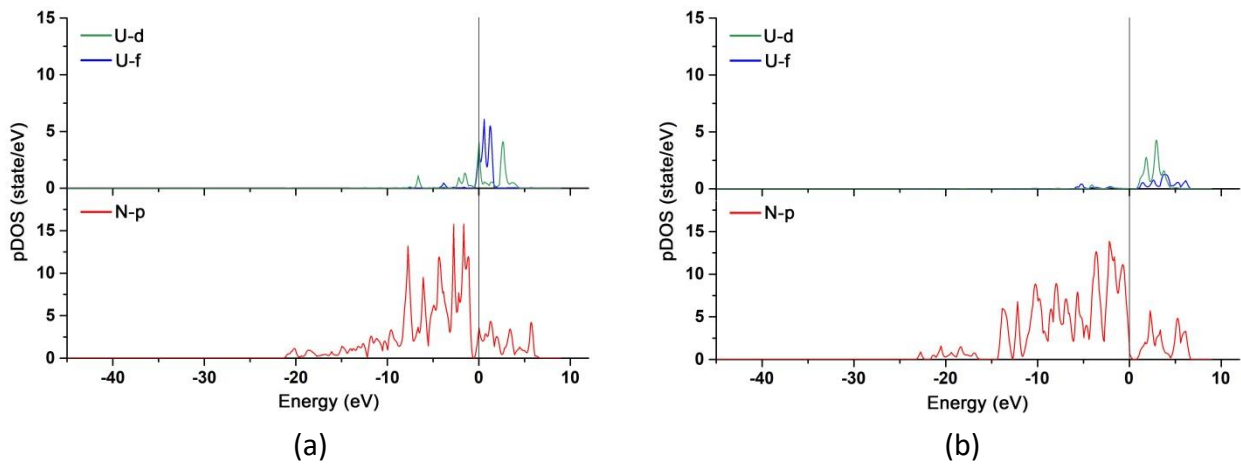

**Fig. S3** The pDOS of (a)  $\text{U-C}_2\text{N}$  and (b)  $\text{U-C}_3\text{N}_4$ . The Fermi level is set to 0 eV.

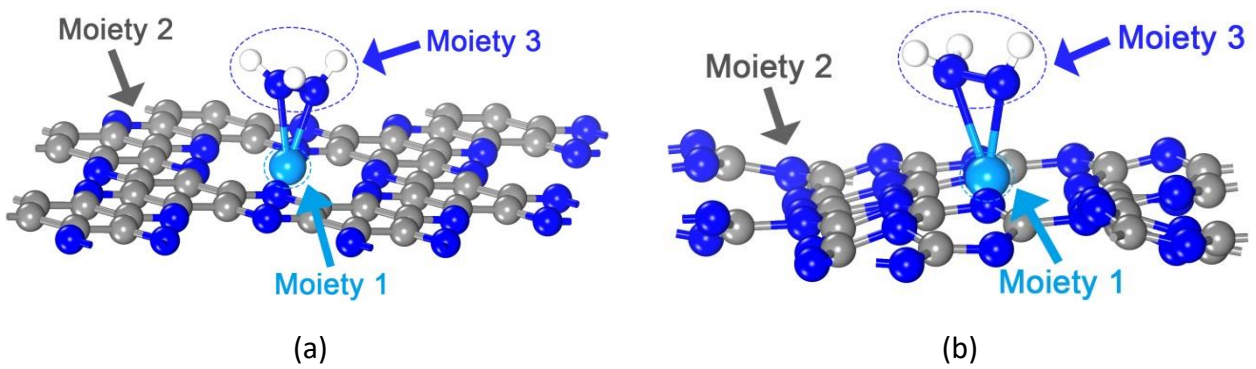

**Fig. S4** The defined three moieties in  $^*\text{N}_x\text{H}_y$  adsorbed on (a)  $\text{U-C}_2\text{N}$  and (b)  $\text{U-C}_3\text{N}_4$ .

**Table S1** Variation of Bader charge of the three moieties in the U-C<sub>2</sub>N model.

| Reaction step | Moiety 1 | Moiety 2 | Moiety 3 |
|---------------|----------|----------|----------|
| 0             | -0.06    | -0.40    | 0.46     |
| 1             | -0.09    | -0.19    | 0.29     |
| 2             | -0.04    | 0.11     | -0.06    |
| 3             | 0.05     | 0.26     | -0.31    |
| 4             | -0.11    | -0.42    | 0.53     |
| 5             | 0.11     | 0.33     | -0.44    |
| 6             | 0.09     | 0.48     | -0.57    |

**Table S2** Variation of Bader charge of the three moieties in the U-C<sub>3</sub>N<sub>4</sub> model.

| Reaction step | Moiety 1 | Moiety 2 | Moiety 3 |
|---------------|----------|----------|----------|
| 0             | -0.24    | -0.27    | 0.50     |
| 1             | -0.10    | -0.11    | 0.21     |
| 2             | -0.22    | -0.55    | 0.78     |
| 3             | 0.23     | 0.80     | -1.03    |
| 4             | -0.17    | -0.35    | 0.52     |
| 5             | 0.18     | 0.27     | -0.45    |
| 6             | 0.09     | 0.54     | -0.63    |
